# Supplementary material for: Juan José Arreola y el género ¿varia invención¿
Source: Royal Society of Chemistry journal article supplement (doi:10.1039/d3fo04348g), 2006-01-01
Supplement: d3fo04348g1.pdf [file d3fo04348g1.pdf]

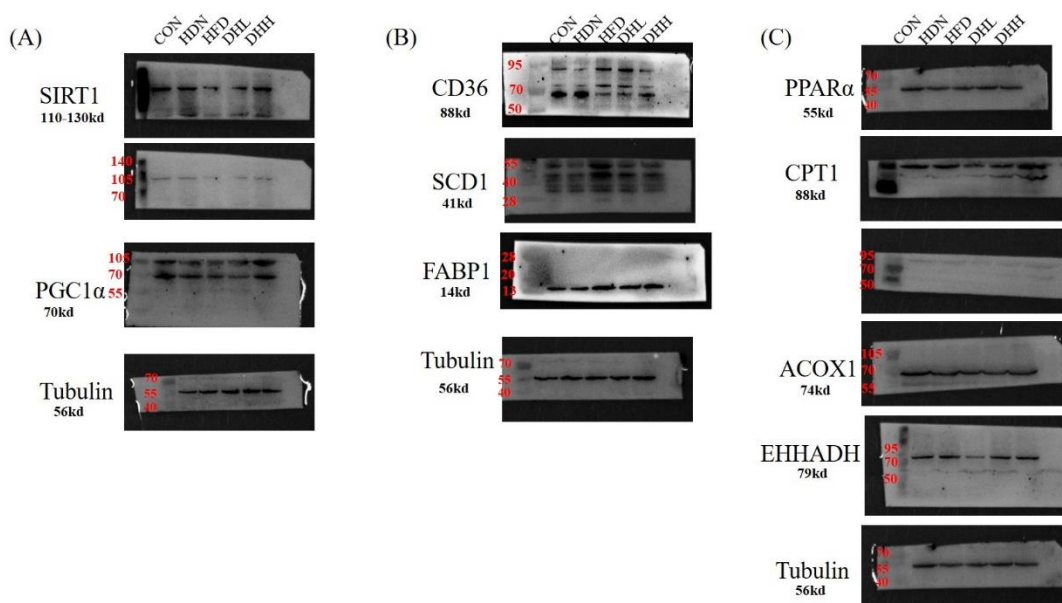

Immunoblot bands of Figure4.

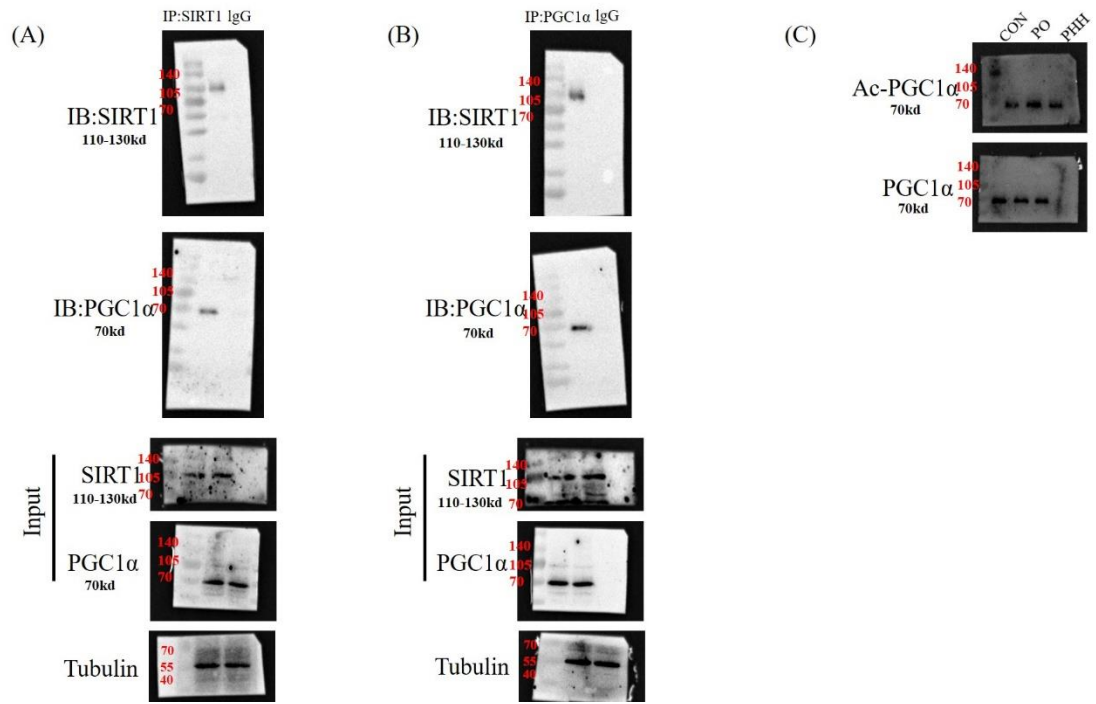

Immunoblot bands of Figure 7.

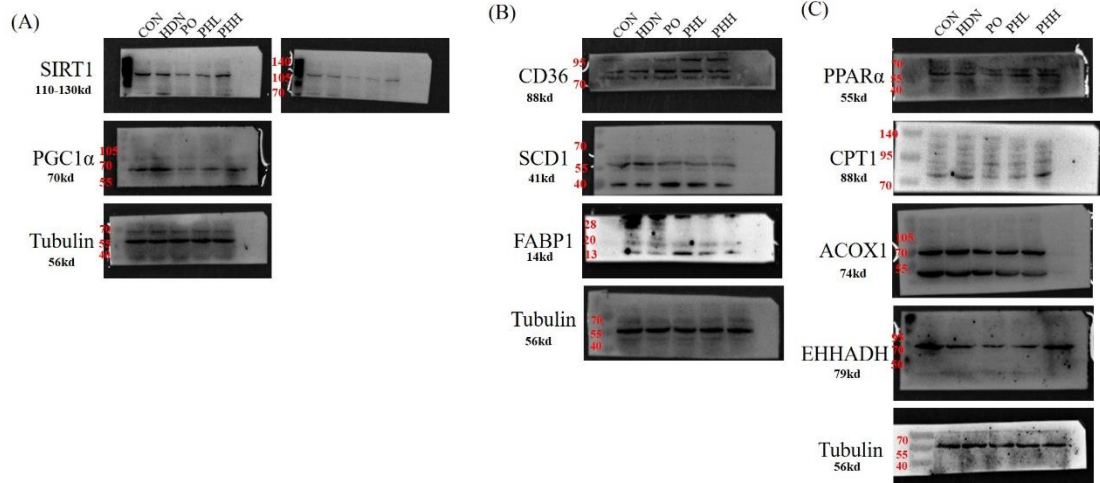

Immunoblot bands of Figure 8.

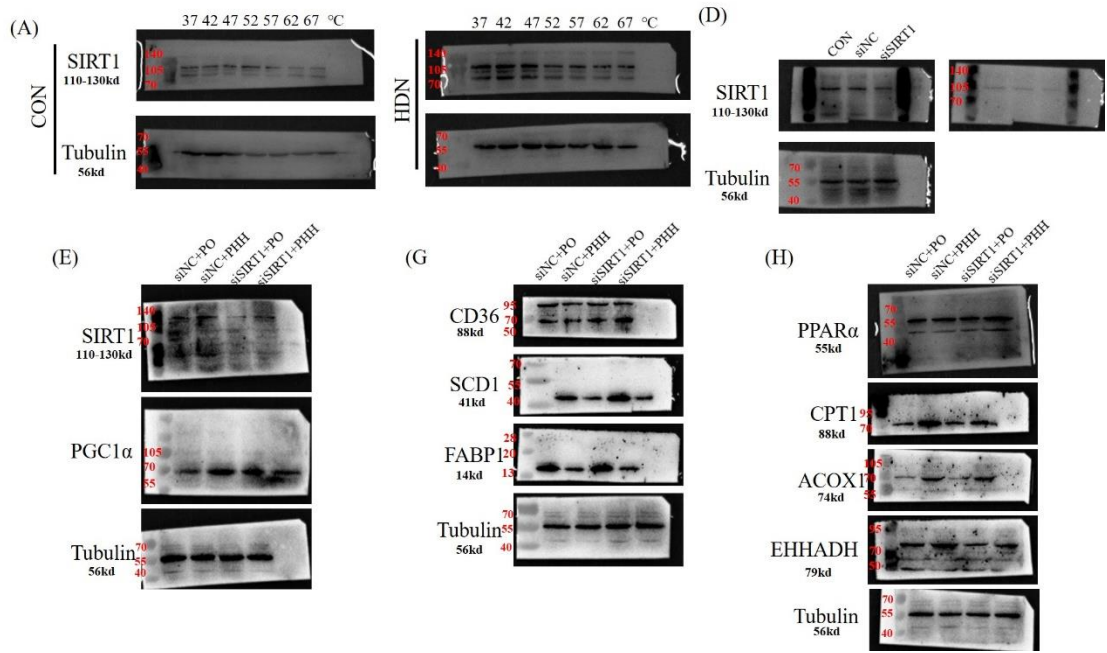

Immunoblot bands of Figure9.

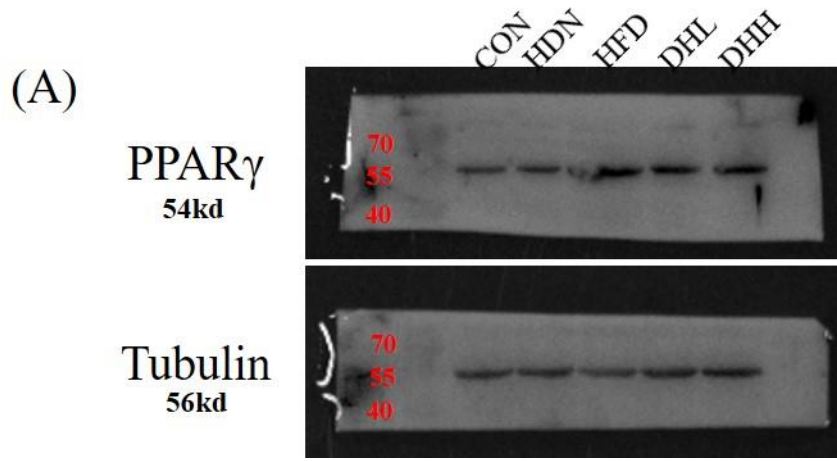

Immunoblot bands of FigureS3.

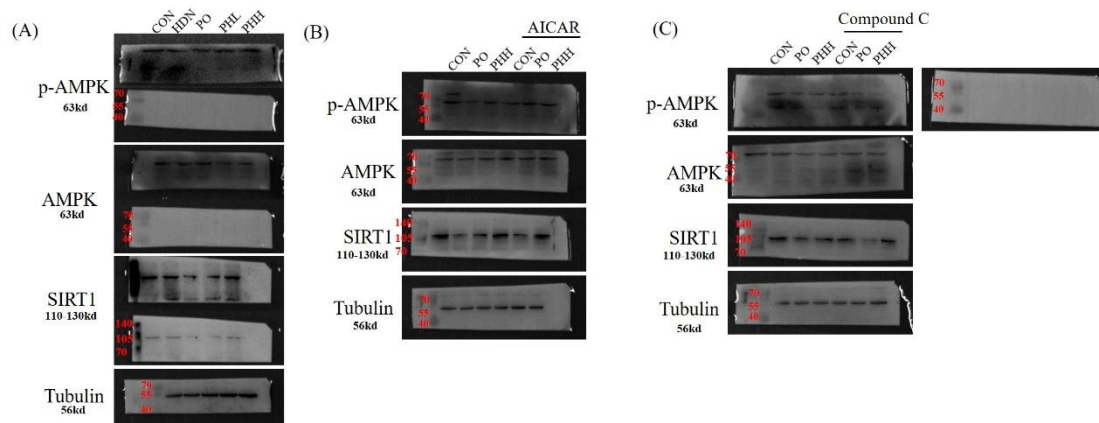

Immunoblot bands of FigureS4.
