# Supplementary material for: Juan José Arreola y el género ¿varia invención¿
Source: Royal Society of Chemistry journal article supplement (doi:10.1039/d3fo04348g), 2006-01-01
Supplement: d3fo04348g2.pdf [file d3fo04348g2.pdf]

**Hesperidin promotes fatty acid  $\beta$ -oxidation by activating  
SIRT1/PGC1 $\alpha$  to improve NAFLD induced by high-fat-diet**

Tong Nie<sup>1</sup>, Xin Wang<sup>1</sup>, Aqun Li<sup>1</sup>, Anshan Shan<sup>2</sup>, Jun Ma<sup>1,3\*</sup>

<sup>1</sup> College of Veterinary Medicine, Northeast Agricultural University, Harbin, 150030, P.  
R. China

<sup>2</sup> College of Animal Science and Technology, Northeast Agricultural University, Harbin,  
150030, P. R. China

<sup>3</sup> Heilongjiang Provincial Key Laboratory of Pathogenic Mechanism for Animal  
Disease and Comparative Medicine, Harbin, 150030, P.R. China

\*Corresponding author.

Address: College of Veterinary Medicine, Northeast Agricultural University, Harbin,  
150030, P. R. China (Jun Ma)

E-mail address: majun@neau.edu.cn

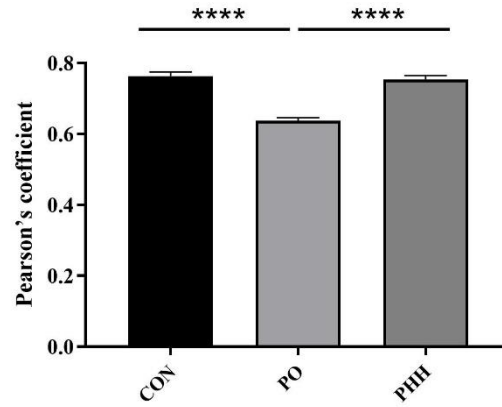

**Figure S1. Pearson's coefficient of Sirt1 and PGC1 $\alpha$  co-localization.**

Pearson can quantify the closeness and direction of correlation of the linear relationship between two continuous variables. Its value is between -1 and 1. The closer the value is to 0, the lower the correlation between variables; the closer the value is to 1 or -1, the stronger the correlation. \*\*\*\* $p < 0.0001$ .

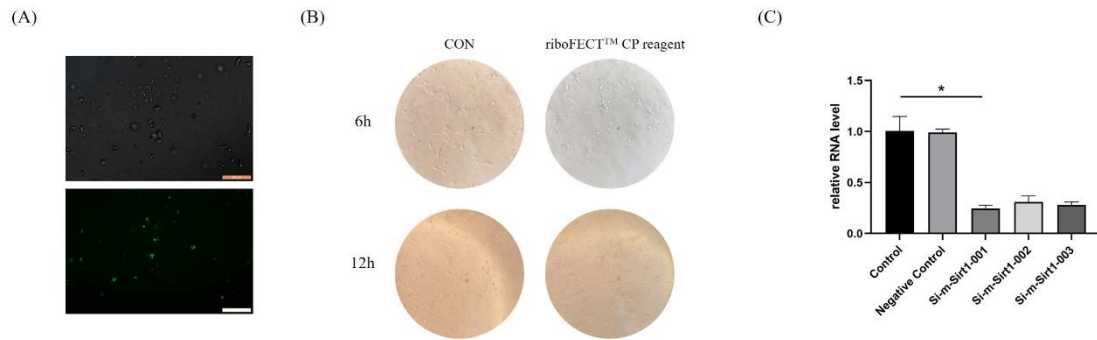

**Figure S2. SiRNA transfection efficiency and transfection reagent toxicity testing.**

(A) AML12 cells were seeded at  $1 \times 10^4$  cells per well in 24-well dishes to achieve a cell density of 30%-50% at the time of transfection. The AML12 cells were transfected with 50 nM of fluorescent siRNA using riboFECT™ CP reagent. The transfection efficiency of siRNA was observed. (B) The effect of transfection reagents on cells with transfection time (6h, 12h). (C) SiRNA transfection efficiency and selection. \* $p < 0.05$ .

(A)

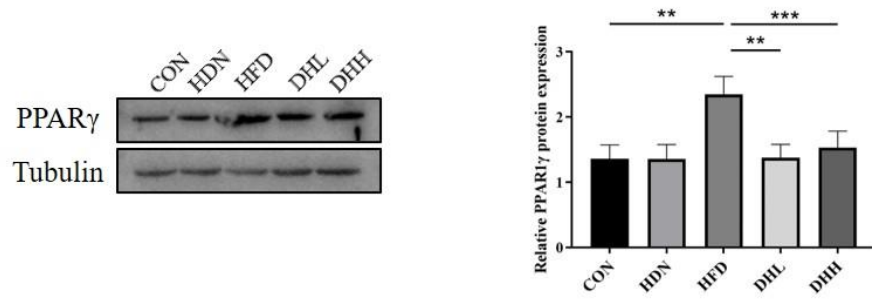

**Figure S3. Effect of HDN on PPAR $\gamma$ .**(A) The protein bands and quantitative results of PPAR $\gamma$ . \*\*p < 0.01 and \*\*\*p < 0.001.

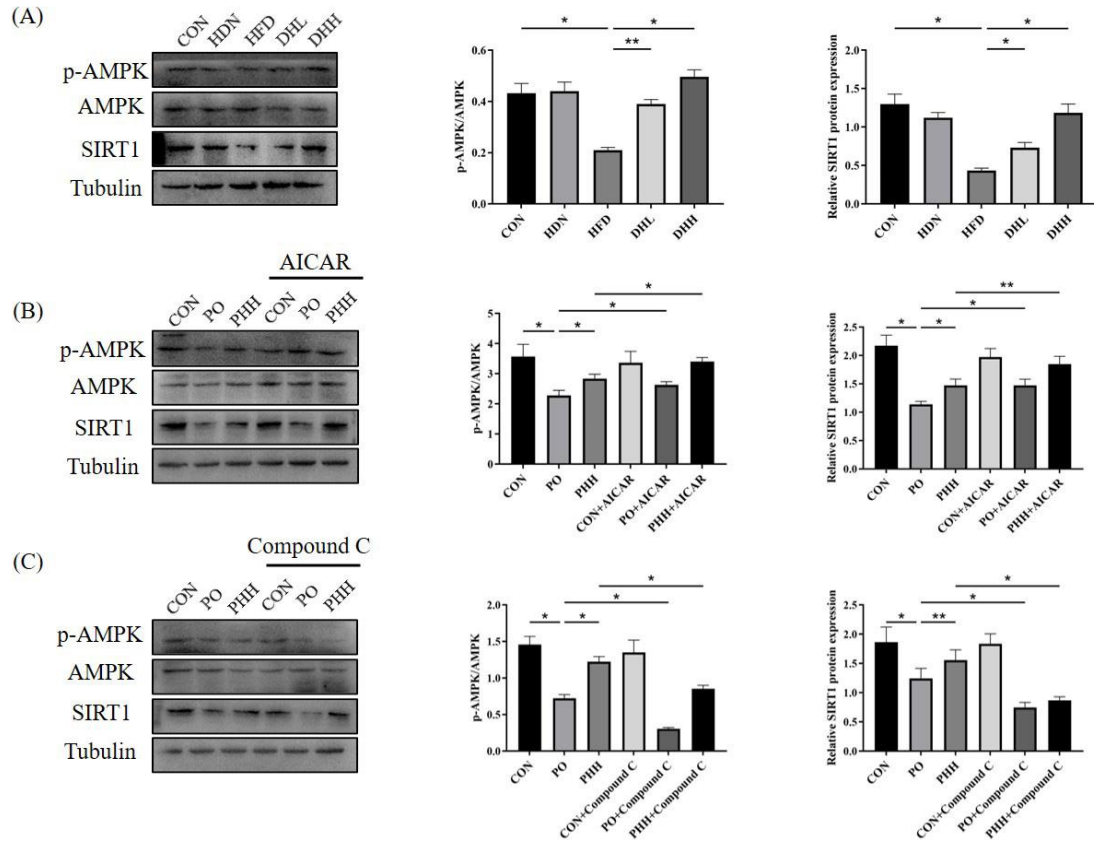

**Figure S4. Effect of HDN on AMPK and SIRT1 after PO and HFD exposure.**

(A) The protein bands and quantitative results of AMPK, p-AMPK and SIRT1. (B) The protein bands and quantification results of AMPK, p-AMPK and SIRT1 after intervention with the AMPK activator AICAR. (C) The protein bands and quantification results of AMPK, p-AMPK and SIRT1 after intervention with the AMPK inhibitor Compound C. \* $p < 0.05$  and \*\* $p < 0.01$ .
